# Supplementary material for: Particulate organic carbon export fluxes across the Seychelles-Chagos thermocline ridge in the western Indian Ocean using 234Th as a tracer
Source: Frontiers journal article supplement (doi:10.3389/fmars.2023.1288422), 2024-01-08
Supplement: Data_Sheet_1.PDF [file Data_Sheet_1.PDF]

Supporting Information for

**POC export fluxes across the Seychelles-Chagos Thermocline Ridge in the western  
Indian Ocean based on  $^{234}\text{Th}$  as a tracer**

Junhyeong Seo<sup>1</sup>, Intae Kim<sup>1,3</sup>, Dong-Jin Kang<sup>2,3</sup>, Hyunmi Lee<sup>1</sup>, Jin Young Choi<sup>1</sup>, Kongtae  
Ra<sup>1,3</sup>, TaeKeun Rho<sup>1</sup>, Kyungkyu Park<sup>1,3</sup>, and Suk Hyun Kim<sup>1\*</sup>

<sup>1</sup>Marine Environmental Research Department, Korea Institute of Ocean Science and Technology (KIOST), Busan 49111,  
South Korea

<sup>2</sup>KIOST School and Academic Program Division, Kioera Institute of Ocean Science and Technology (KIOST), Busan  
49111, South Korea

<sup>3</sup>Department of Ocean Science, University of Science and Technology (UST), Daejeon 34113, South Korea

**Contents of this file**

Table S1

**Introduction**

This supporting information contains one supplementary table referred to in the article text.

**Table S1.** Euphotic zones in 2017 and 2018 cruises.

| Year | Lat     | Lon     | Euphotic zone (m) |
|------|---------|---------|-------------------|
| 2017 | 4.00°N  | 67.00°E | 161               |
| 2017 | 3.00°S  | 67.00°E | 55                |
| 2017 | 5.27°S  | 67.90°E | 131               |
| 2017 | 7.00°S  | 67.00°E | 43                |
| 2017 | 8.00°S  | 67.00°E | 102               |
| 2017 | 9.00°S  | 67.00°E | 127               |
| 2018 | 13.00°S | 60.00°E | 63                |
| 2018 | 12.00°S | 60.00°E | 72                |
| 2018 | 11.00°S | 60.00°E | 59                |
| 2018 | 10.00°S | 60.00°E | 64                |
| 2018 | 8.00°S  | 60.00°E | 52                |
| 2018 | 5.00°S  | 60.00°E | 80                |
| 2018 | 4.00°S  | 67.00°E | 68                |
| 2018 | 7.00°S  | 67.00°E | 104               |
| 2018 | 9.00°S  | 67.00°E | 71                |
| 2018 | 11.00°S | 67.00°E | 71                |
| 2018 | 14.00°S | 67.00°E | 34                |
| 2018 | 16.00°S | 67.00°E | 135               |
| 2018 | 19.00°S | 67.00°E | 90                |
| 2018 | 21.00°S | 67.00°E | 31                |
| 2018 | 23.00°S | 67.00°E | 102               |
